# Supplementary material
Source: Springer Nature journal article supplement (https://www.springermedizin.de/resource/supplementary/12974_2011_419_MOESM19_ESM.pdf/9601568)
Supplement: MOESM19 [file 9601568]

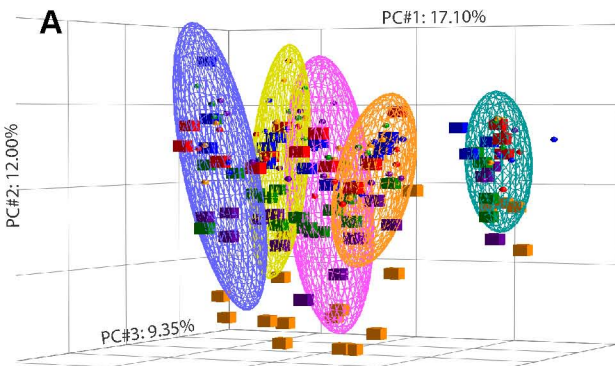

| Time (hr) | Exposure | Seizure | Brain Region      |
|-----------|----------|---------|-------------------|
| 0.25      | ● Saline | ■ N     | ■ Amygdala        |
| 1         | ■ Sarin  | ■ Y     | ■ Hippocampus     |
| 3         |          |         | ■ Piriform Cortex |
| 6         |          |         | ■ Septum          |
| 24        |          |         | ■ Thalamus        |

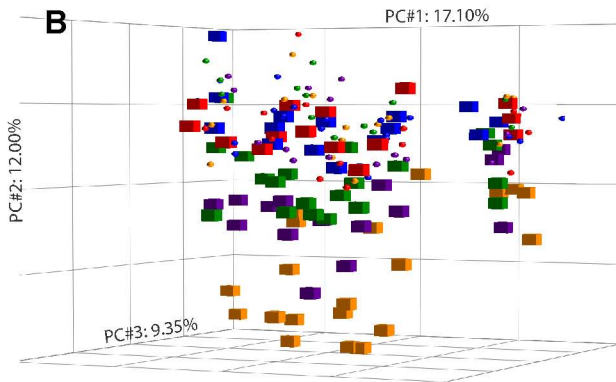

| Time (hr) | Exposure | Seizure |
|-----------|----------|---------|
| 0.25      | ● Saline | ■ N     |
| 1         | ■ Sarin  | ■ Y     |
| 3         |          |         |
| 6         |          |         |
| 24        |          |         |

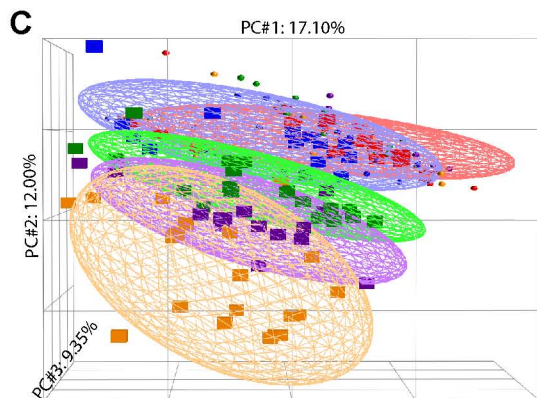

| Time (hr) | Exposure | Seizure | Time (h) x Exposure |
|-----------|----------|---------|---------------------|
| 0.25      | ● Saline | ■ N     | ■ 0.25 x Sarin      |
| 1         | ■ Sarin  | ■ Y     | ■ 1 x Sarin         |
| 3         |          |         | ■ 3 x Sarin         |
| 6         |          |         | ■ 6 x Sarin         |
| 24        |          |         | ■ 24 x Sarin        |

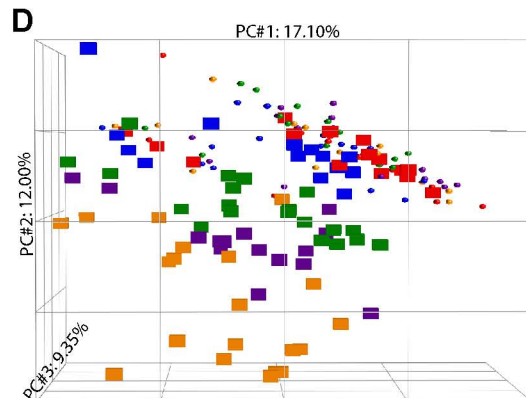

| Time (hr) | Exposure | Seizure |
|-----------|----------|---------|
| 0.25      | ● Saline | ■ N     |
| 1         | ■ Sarin  | ■ Y     |
| 3         |          |         |
| 6         |          |         |
| 24        |          |         |
